# Supplementary material for: Ceria nanorods as highly stable free radical scavengers for highly durable proton exchange membranes
Source: Royal Society of Chemistry journal article supplement (doi:10.1039/d1ra05026e), 2021-01-01
Supplement: d1ra05026e1.pdf [file d1ra05026e1.pdf]

**Ceria nanorods as highly stable free radical scavenger for highly  
durable proton exchange membranes**

Rui Zhiyan, Li Qingbing, Huo Youxiu, Ding Rui, Liu Jia, Li Jia and Liu Jianguo

Figure S1 is the typical hydrogen crossover curve for the Nafion/2%CeO<sub>2</sub> composite membranes (the thickness is 45μm). The black curve was tested after activating, and the red curve was tested immediately after open circuit voltage holding test without any recovery.

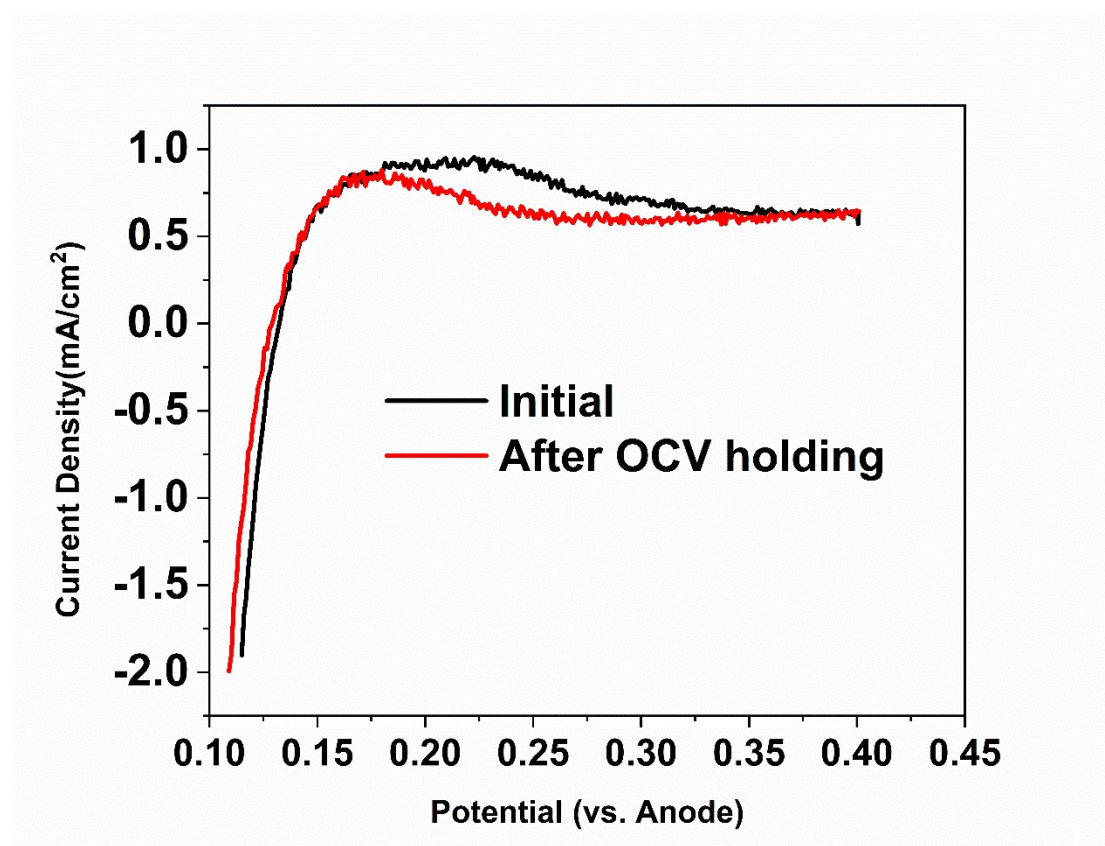

Figure S1. a) hydrogen crossover before open circuit voltage holding for Nafion/2%CeO<sub>2</sub> composite membranes; b) hydrogen crossover tested immediately after open circuit voltage test without recovery for Nafion/2%CeO<sub>2</sub> composite membranes.

Figure S2 is the adsorption desorption isotherms and pore diameter distribution for both ceria nanorods and commercial ceria nanoparticles.

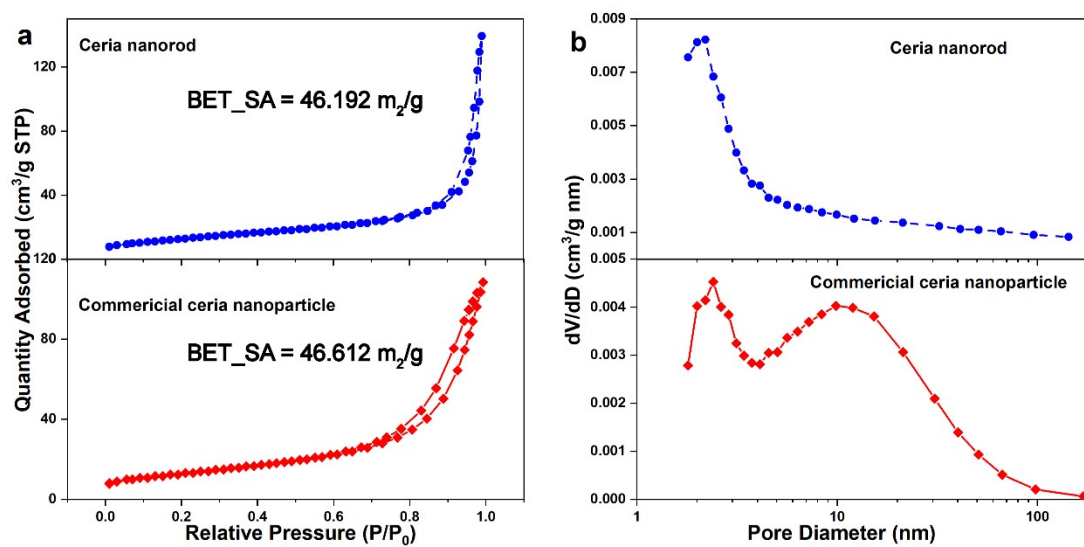

Figure S2. a)  $N_2$  adsorption desorption isotherm and b) pore diameter distribution of ceria nanorods and ceria nanoparticles.

Table S1 is the peak area for each peak in Ce3d XPS spectrum.

Table S1. Peak area in Ce3d XPS spectrum.

| Ce3d              |            |                | Ceia nanoparticle |           |              | Ceia nanowrod |           |              |
|-------------------|------------|----------------|-------------------|-----------|--------------|---------------|-----------|--------------|
|                   | Spin orbit | Designation    | BE (eV)           | FWHM (eV) | area         | BE (eV)       | FWHM (eV) | area         |
| Ce <sup>3+</sup>  | Ce3d5/2    | V <sub>0</sub> | 879.11            | 2.5       | 1127.98      | 879.16        | 2.94      | 1241.65      |
|                   | Ce3d3/2    | U <sub>0</sub> | 897.25            | 2.87      | 897.75       | 897.35        | 2.93      | 860.65       |
|                   | Ce3d5/2    | V'             | 885.16            | 2.94      | 6298.39      | 885.03        | 2.91      | 6660.91      |
|                   | Ce3d3/2    | U'             | 903.29            | 2.98      | 3779.04      | 902.83        | 2.93      | 3988.64      |
| Ce <sup>4+</sup>  | Ce3d5/2    | V              | 882.18            | 2.71      | 15029.8<br>1 | 882           | 2.54      | 14483.1<br>7 |
|                   | Ce3d3/2    | U              | 900.66            | 2.4       | 8893.14      | 900.33        | 2.37      | 8630.21      |
|                   | Ce3d5/2    | V''            | 888.59            | 3.05      | 6958.26      | 888.51        | 2.93      | 6863.14      |
|                   | Ce3d3/2    | U''            | 907.23            | 3         | 4281         | 906.89        | 2.89      | 3810.69      |
|                   | Ce3d5/2    | V'''           | 898.03            | 2.4       | 12167.7<br>6 | 897.94        | 2.36      | 12328.9<br>1 |
|                   | Ce3d3/2    | U'''           | 916.4             | 2.52      | 8715.14      | 916.27        | 2.5       | 9060.03      |
| <b>n(Ce):n(O)</b> |            |                | <b>0.5232</b>     |           |              | <b>0.5251</b> |           |              |
